# Supplementary material
Source: publisher site journal article supplement (https://www.dovepress.com/article/315619)
Supplement: Supplementary file 1 [file get_supplementary_file.php]

**Electronic supplementary information**

**Table S1.** IC50 of free DTX (using 1 mg/mL DTX solution in DMSO), DTX/Lipo, and DTX/AE-Lipo in MDA-MB-231 cells when exposed to a series of equivalent concentrations of DTX for 48 h.

| **Sample** | **IC50 of formulations in MDA-MB-231 cells (µg/mL)** |
| --- | --- |
| free DTX | 7.13 ± 0.51 |
| DTX/Lipo | 8.68 ± 0.95 |
| DTX/AE-Lipo | 4.72 ± 1.08 |

**Abbreviations:** DTX/Lipo, DTX-loaded liposomes; DTX/AE-Lipo, DTX-loaded targeting liposomes.

**
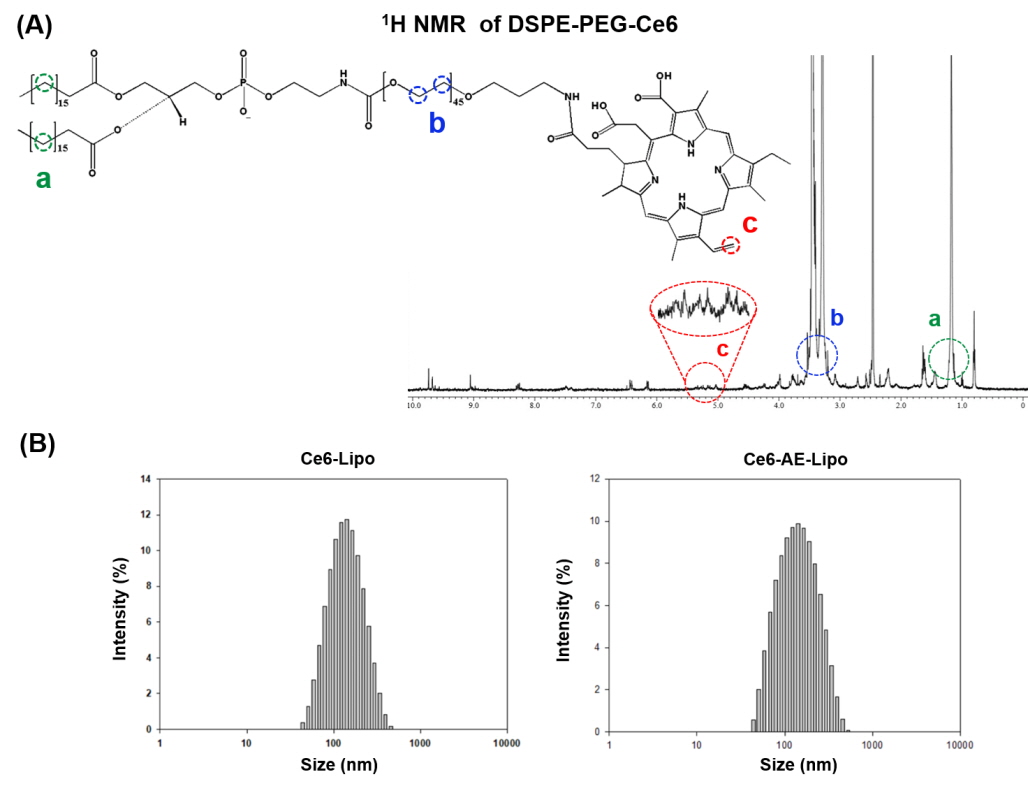
**

**Figure S1.** (A) Validation of synthesized DSPE-PEG-Ce6 by 1H NMR and (B) size distribution of Ce6-Lipo and Ce6-AE-Lipo.

**Abbreviations:** Ce6-Lipo, Ce6 conjugated Lipo; Ce6-AE-Lipo, Ce6 conjugated AE-Lipo.


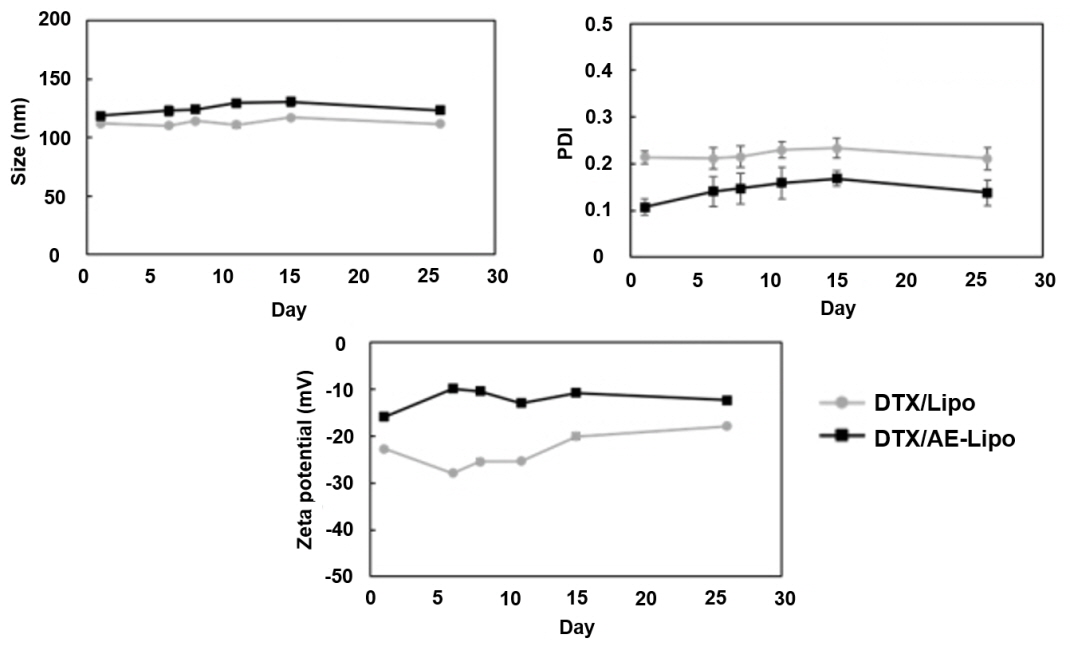


**Figure S2.** Stability of DTX/Lipo and DTX/AE-Lipo.

**Abbreviations:** DTX/Lipo, DTX-loaded liposomes; DTX/AE-Lipo, DTX-loaded targeting liposomes.


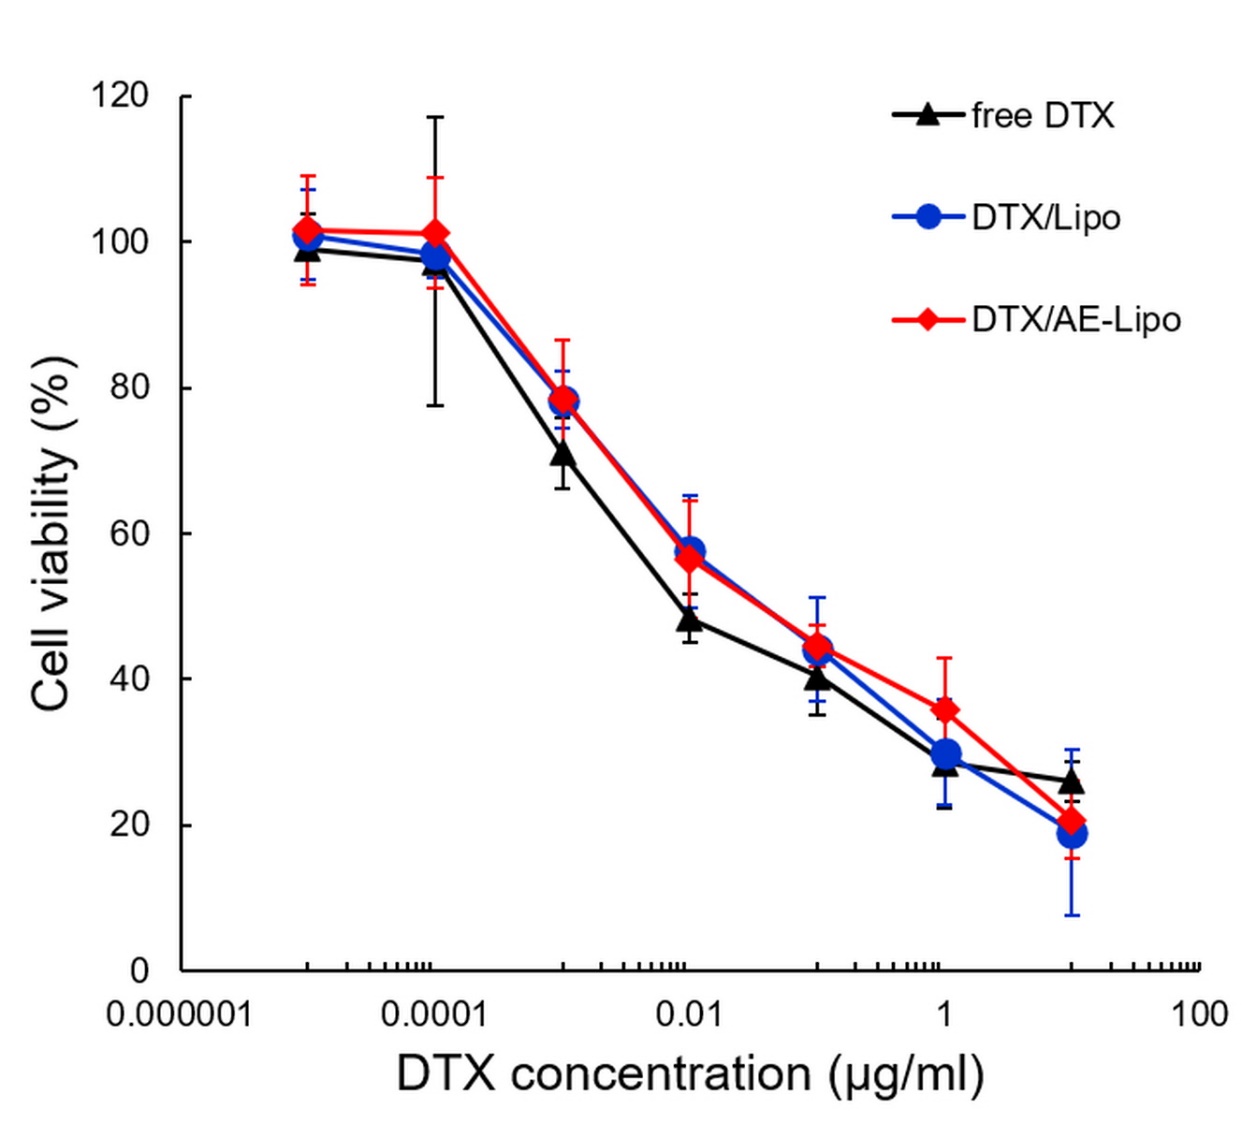


**Figure S3.** Cell viability of MCF-7 cells treated with free DTX (using 1 mg/mL DTX solution in DMSO), DTX/Lipo and DTX/AE-Lipo used in a series of equivalent concentrations of DTX for 48 h.

**Abbreviations:** DTX/Lipo, DTX-loaded liposomes; DTX/AE-Lipo, DTX-loaded targeting liposomes.


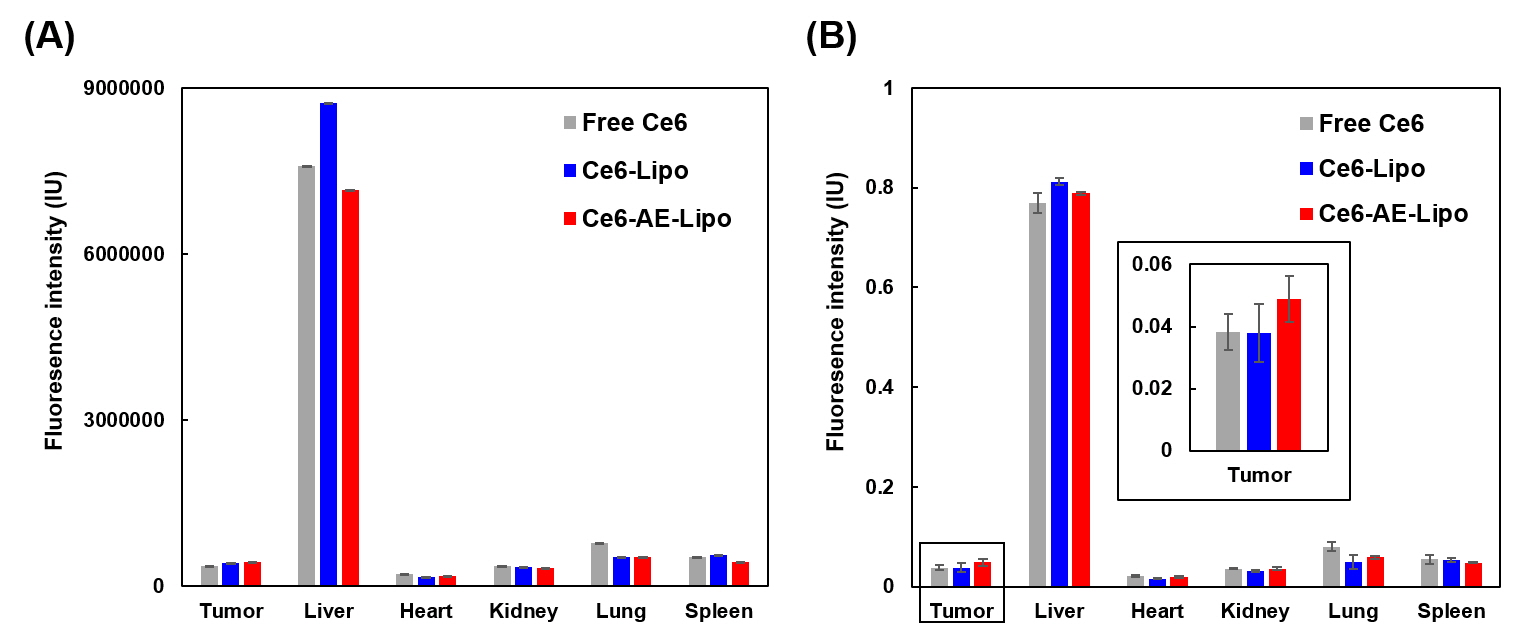


**Figure S4.** (A) Overall fluorescence intensity of accumulated systems in each organ and (B) the fluorescence intensity of each organ normalized by sum of total fluorescence intensity from all organs.

**Abbreviations:** Ce6-AE-Lipo, Ce6 conjugated AE-Lipo; Ce6-Lipo, Ce6 conjugated Lipo.
